# Supplementary material
Source: MDPI journal article supplement (https://www.mdpi.com/2073-4352/7/7/195)
Supplement: s1 [file s1]

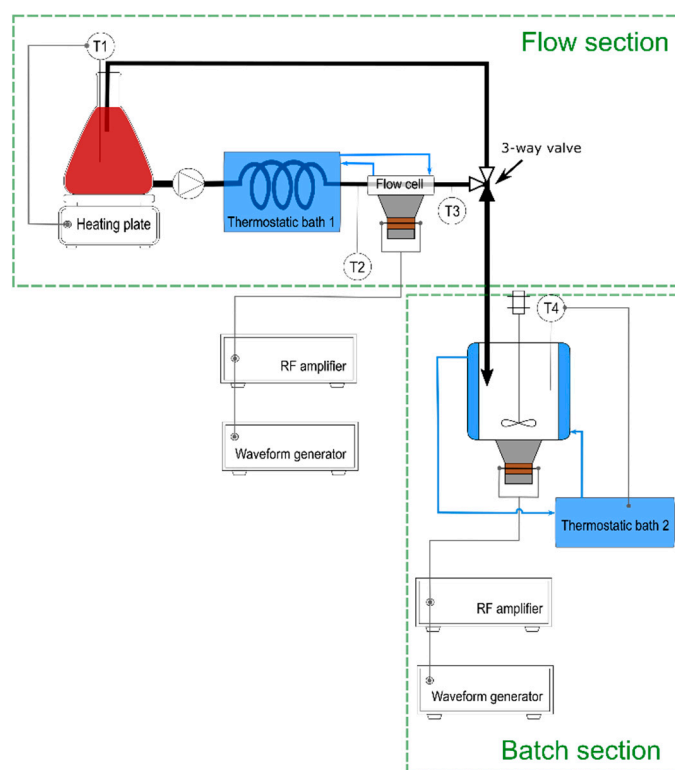

**Figure S1.** Continuous mode 1.

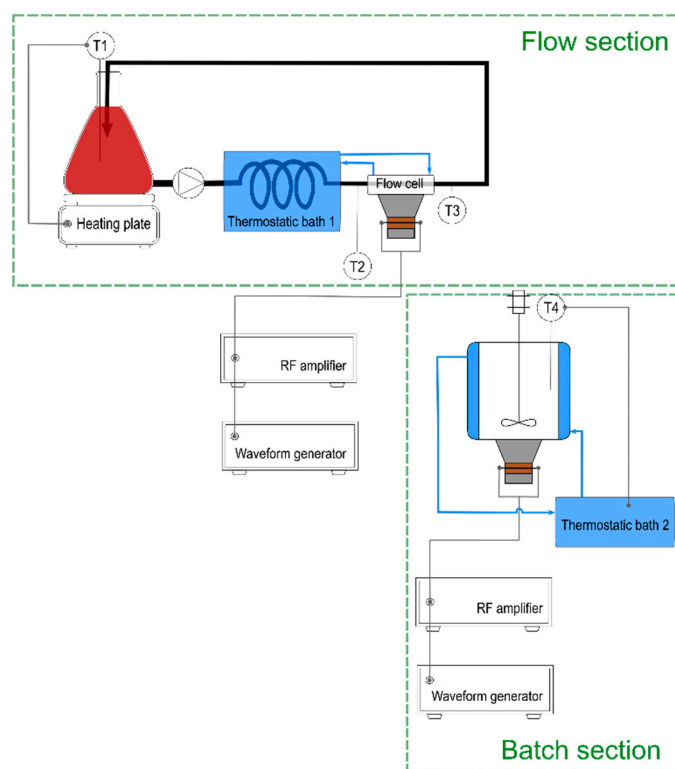

**Figure S2.** Continuous mode 2.

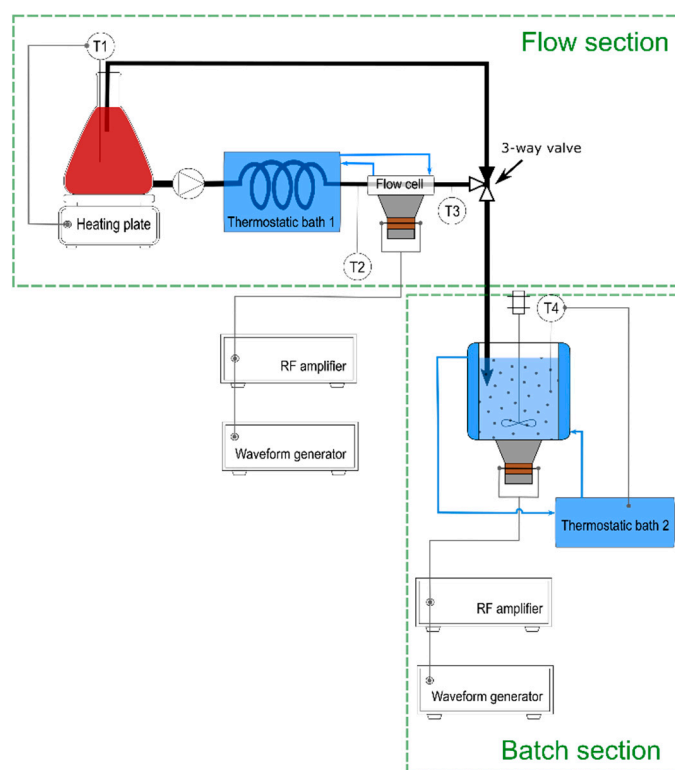

**Figure S3.** Continuous mode 3.

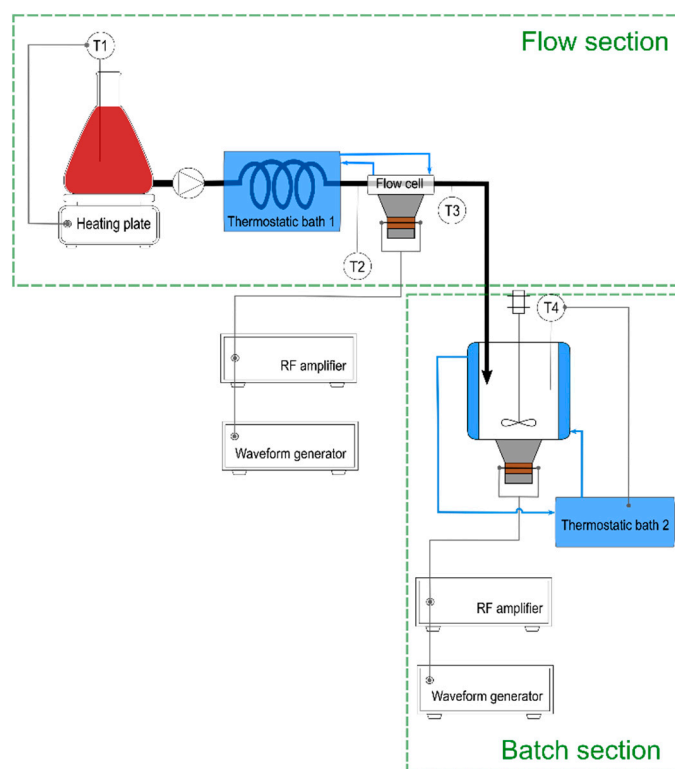

**Figure S4.** Continuous mode 4.

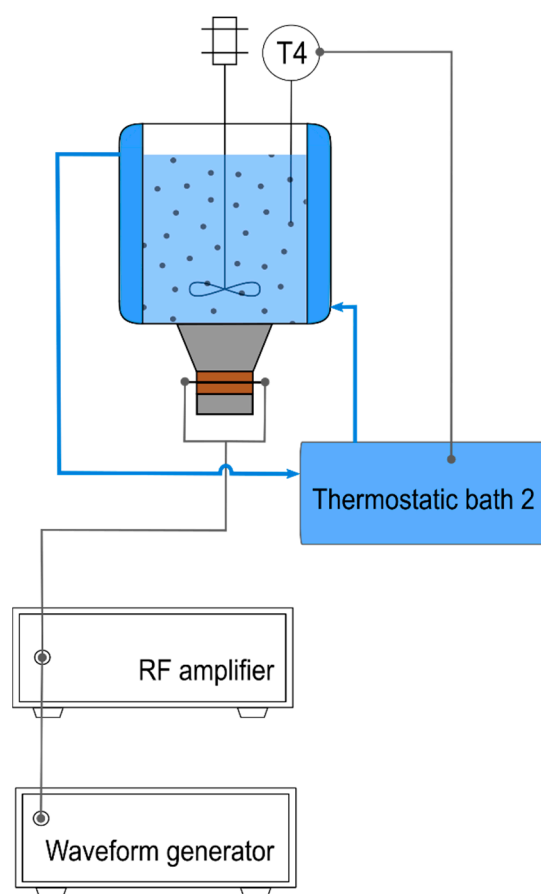

**Figure S5.** Batch mode.
